# Supplementary material for: Global variability in belowground autotrophic respiration in terrestrial ecosystems
Source: Copernicus journal article supplement (doi:10.5194/essd-11-1839-2019), 2019-11-28
Supplement: Supplementary file 1 [file essd-11-1839-2019-supplement.pdf]

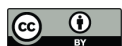

*Supplement of*

## **Global variability in belowground autotrophic respiration in terrestrial ecosystems**

**Xiaolu Tang et al.**

*Correspondence to:* Wenjie Zhang ([wenjie.zhang@uts.edu.au](mailto:wenjie.zhang@uts.edu.au)) and Sicong Gao ([sicong.gao@student.uts.edu.au](mailto:sicong.gao@student.uts.edu.au))

The copyright of individual parts of the supplement might differ from the CC BY 4.0 License.

## Figures

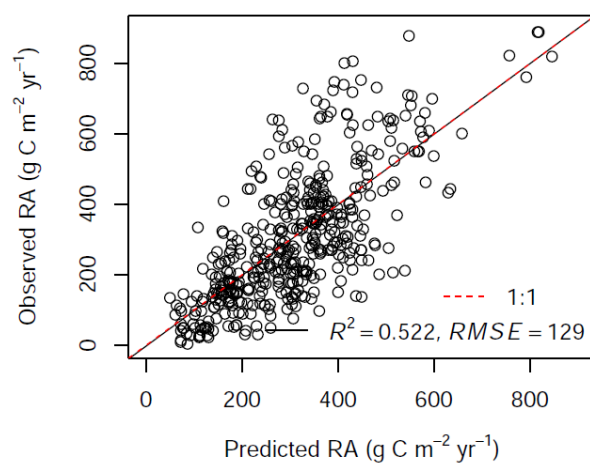

**Fig. S1.** Comparison between data-derived belowground autotrophic respiration (RA) and observed RA using a 10-fold cross-validation.

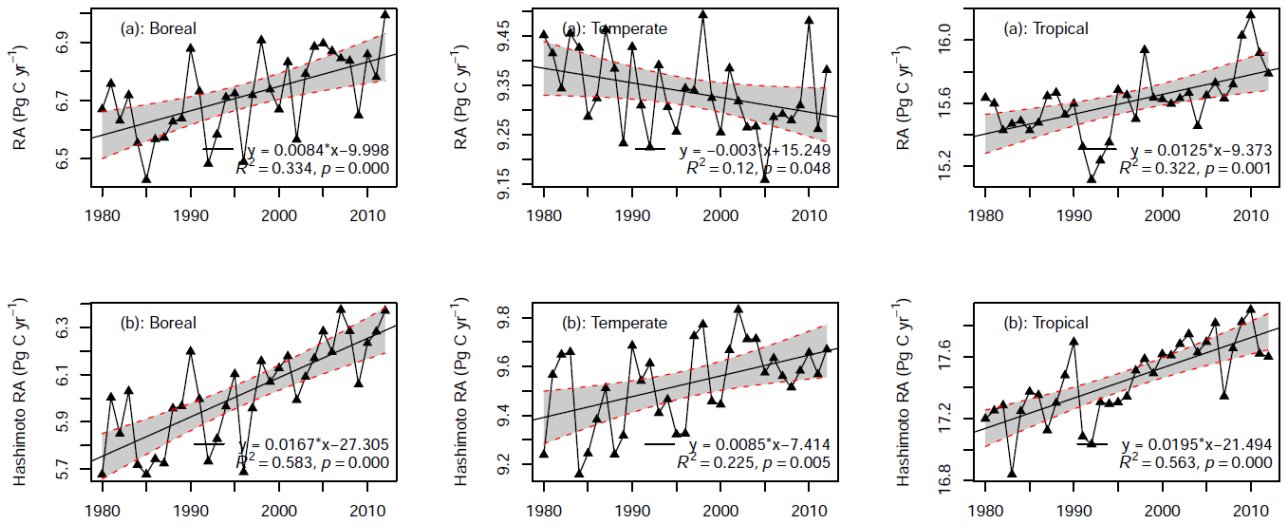

**Fig. S2.** Inter-annual variability of belowground autotrophic respiration (RA) for RF-RA (a) and Hashimoto2015-RA (b) for boreal, temperal and tropical areas

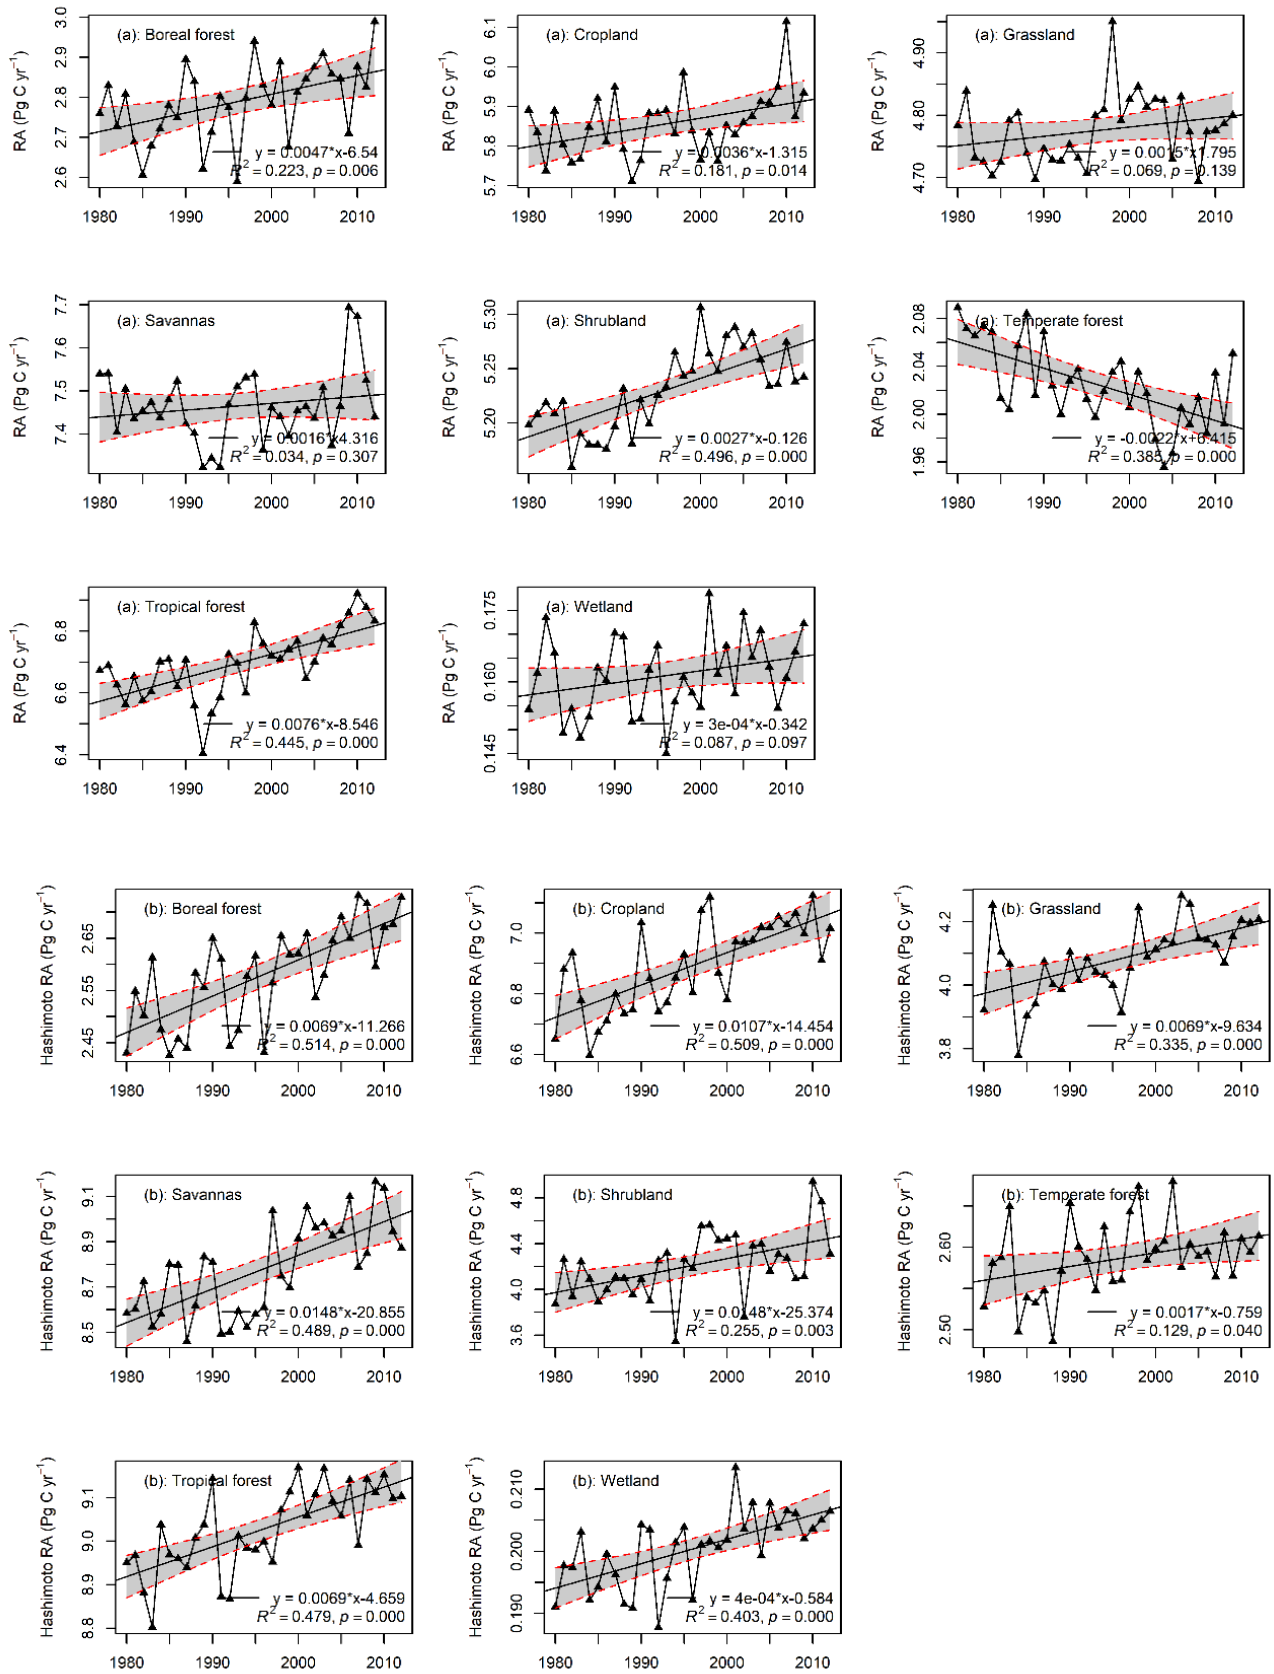

**Fig. S3.** Inter-annual variability of belowground autotrophic respiration (RA) for RF-RA (a) and Hashimoto2015-RA (b) for boreal forest, cropland, grassland, savannas, shrubland, temperate forest, tropical forest and wetland.

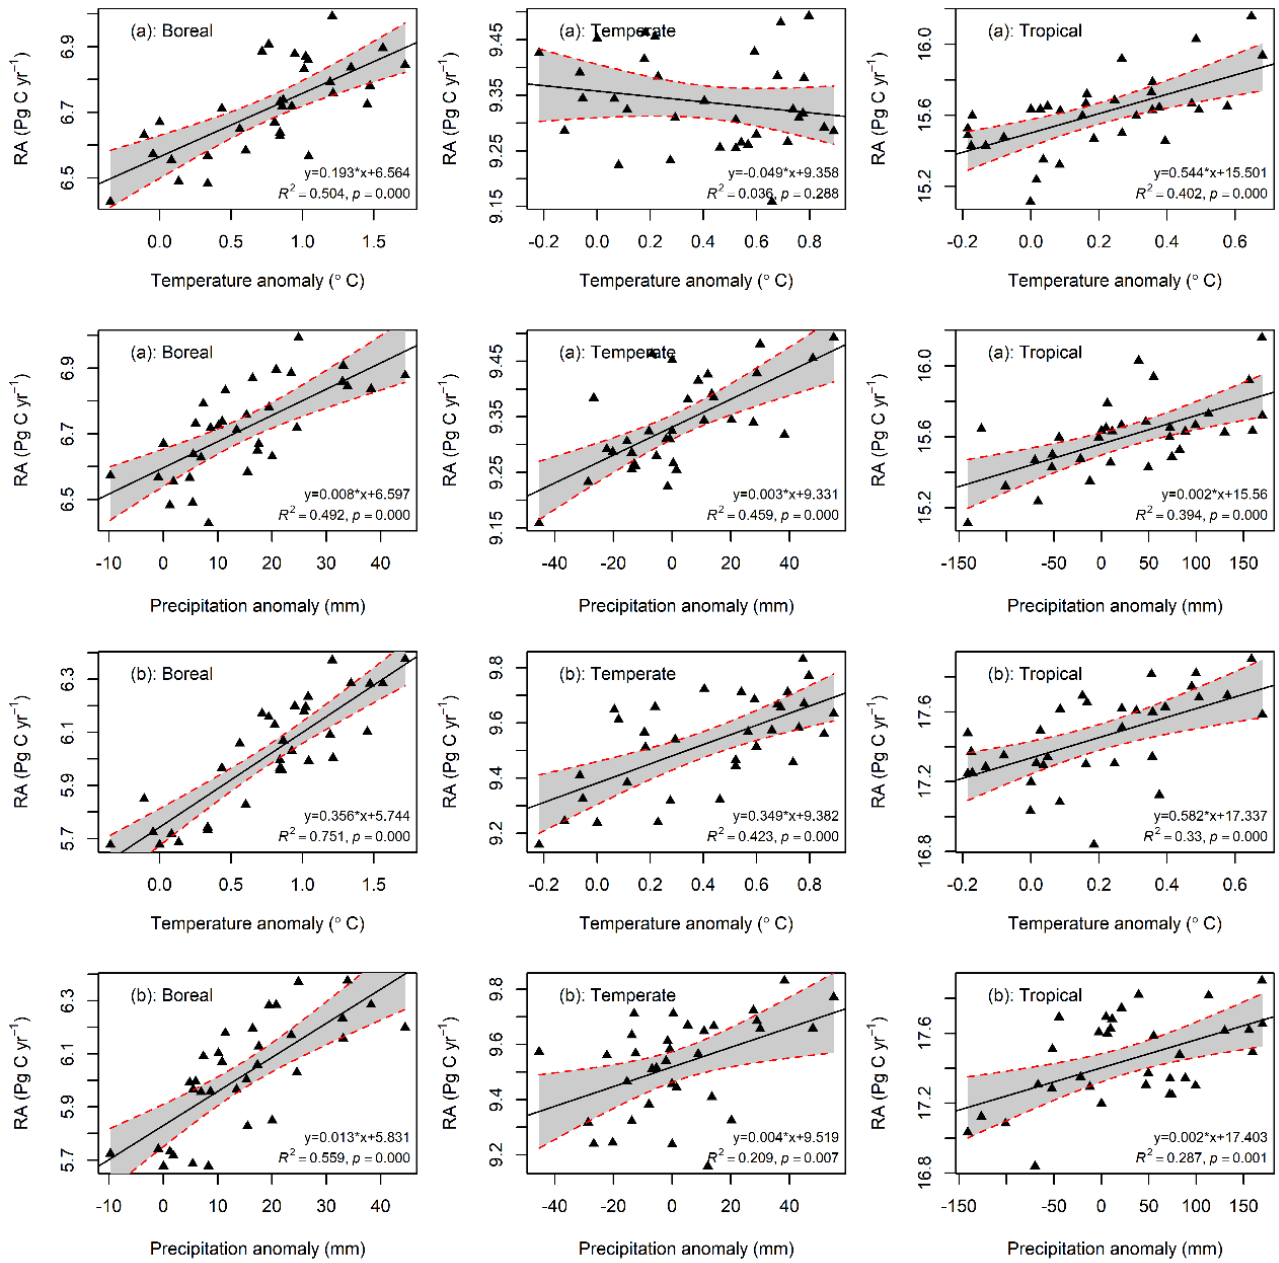

**Fig. S4.** The relationships between total belowground autotrophic respiration (RA) and temperature/precipitation anomaly for RF-RARF-RA (a) and Hashimoto2015-RA (b) for boreal, temperate and tropical areas.

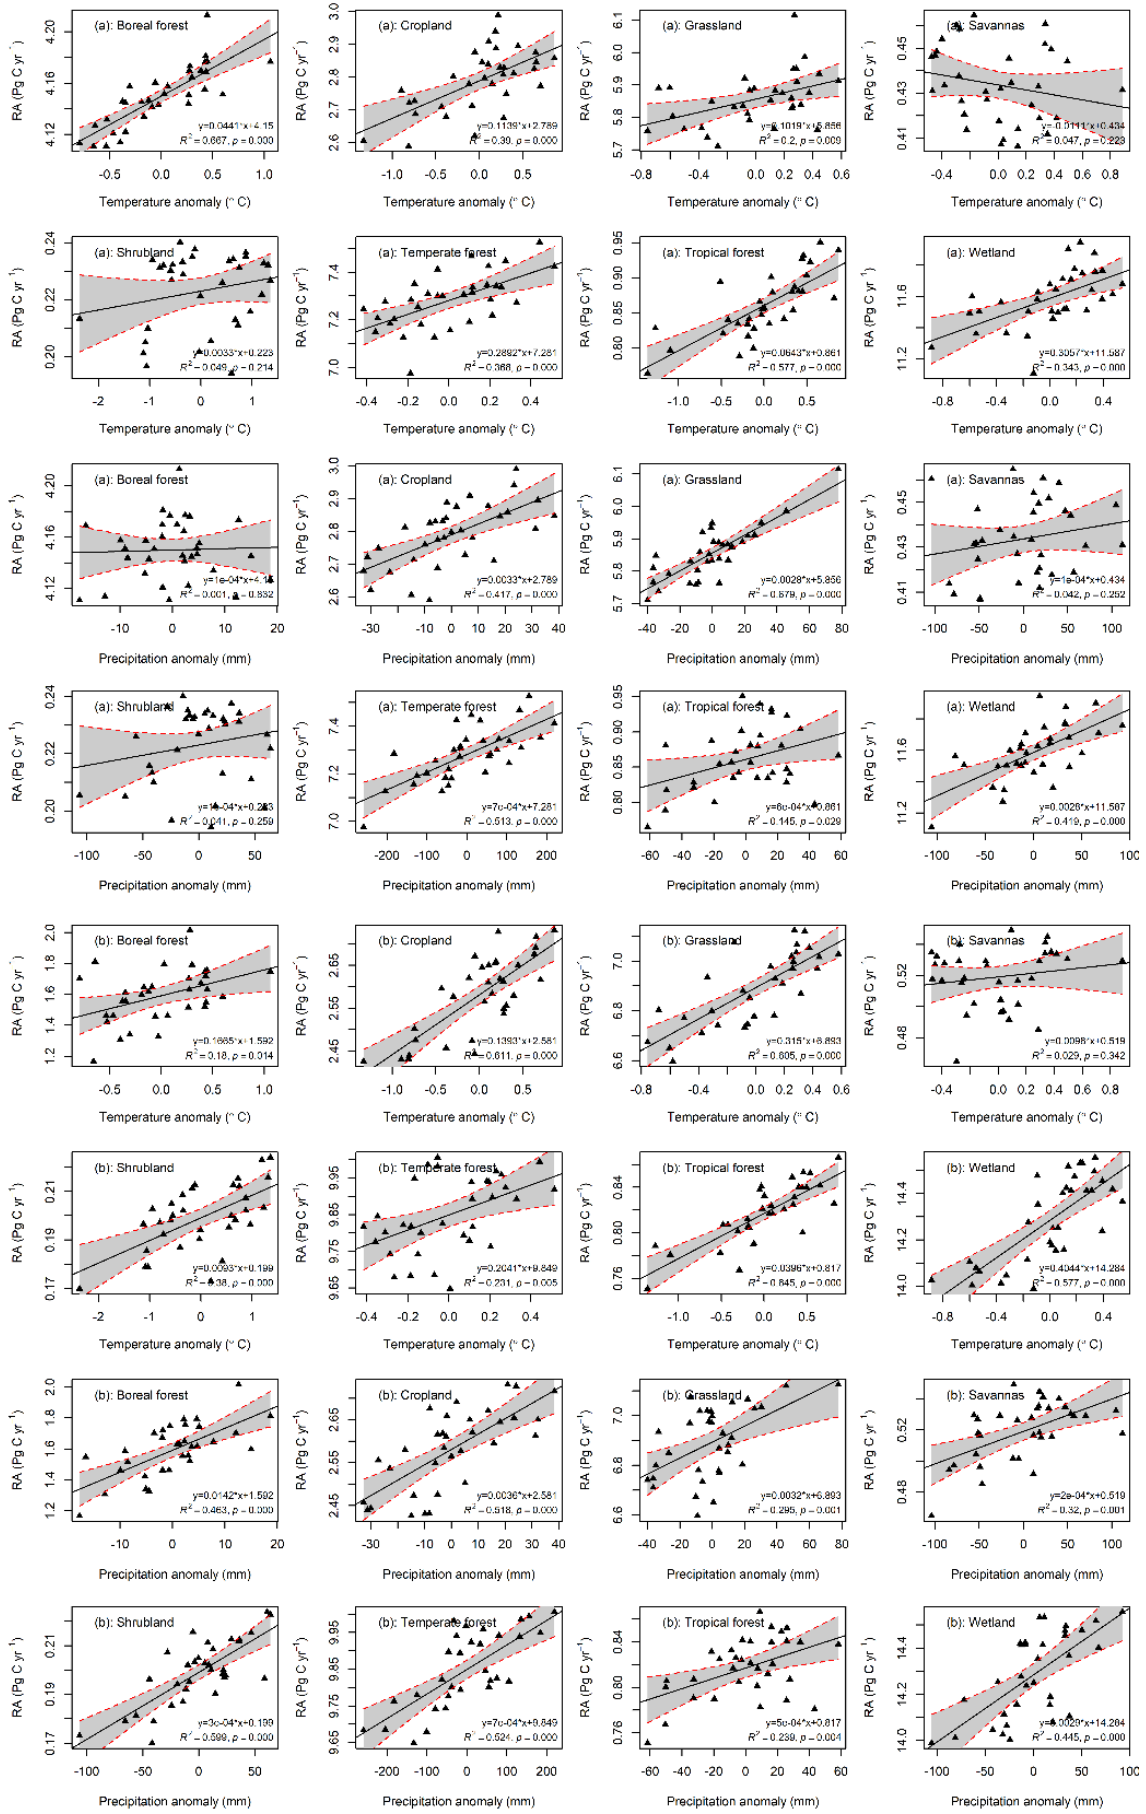

**Fig. S5.** The relationships between total belowground autotrophic respiration (RA) and temperature/precipitation anomaly for RF-RA (a) and Hashimoto2015-RA (b) for eight biomes

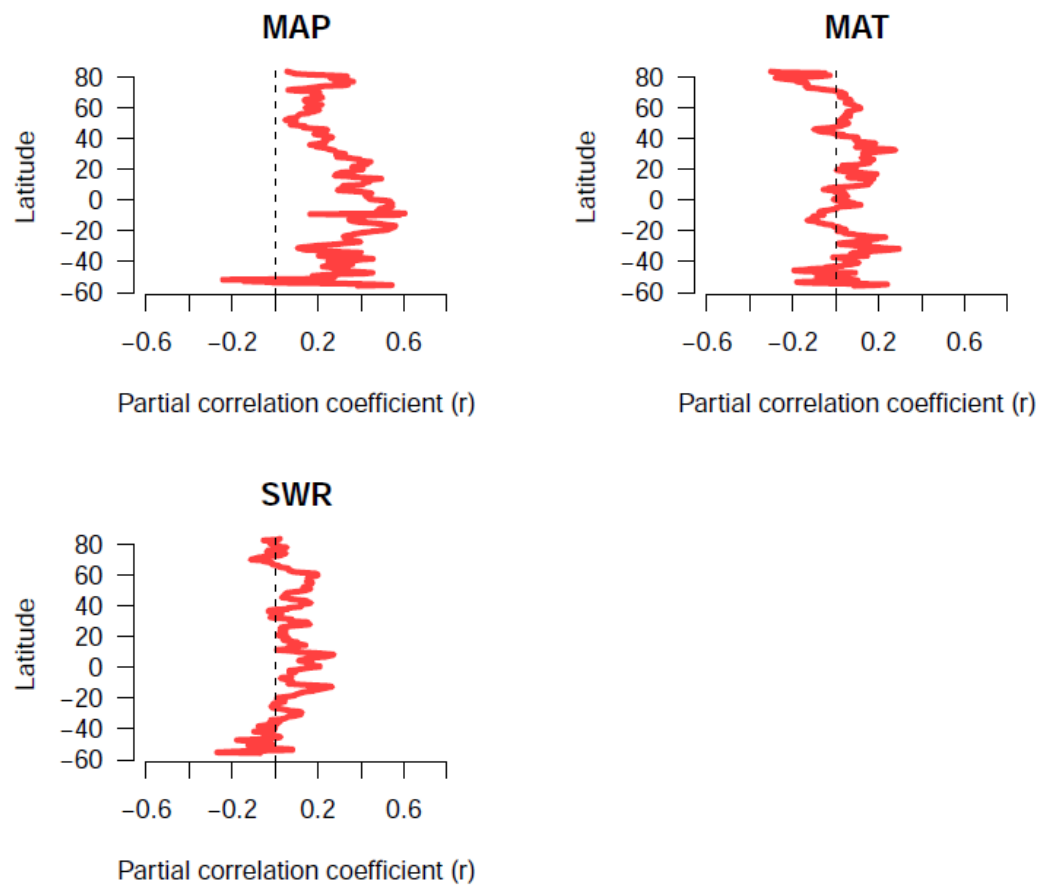

**Fig. S6.** Latitudinal patterns of partial correlation coefficient between RF-RA and mean annual temperature (MAT), mean annual precipitation (MAP) and shortwave radiation (SWR).
